# Supplementary material
Source: MDPI journal article supplement (https://www.mdpi.com/2073-4395/11/3/581)
Supplement: s1 [file s1]

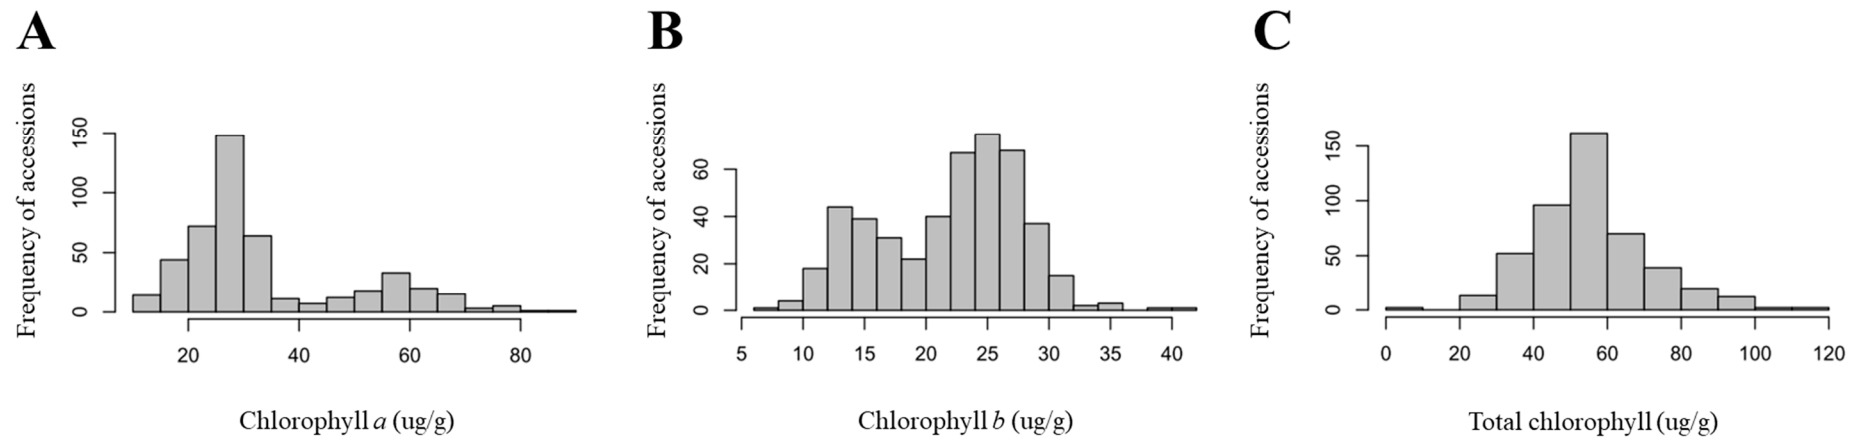

**Figure S1.** Frequency distribution of an average of two chlorophyll content and sum of total chlorophyll contents in 469 accessions over three years. (A) Chlorophyll *a* (B) Chlorophyll *b* (C) Total chlorophyll

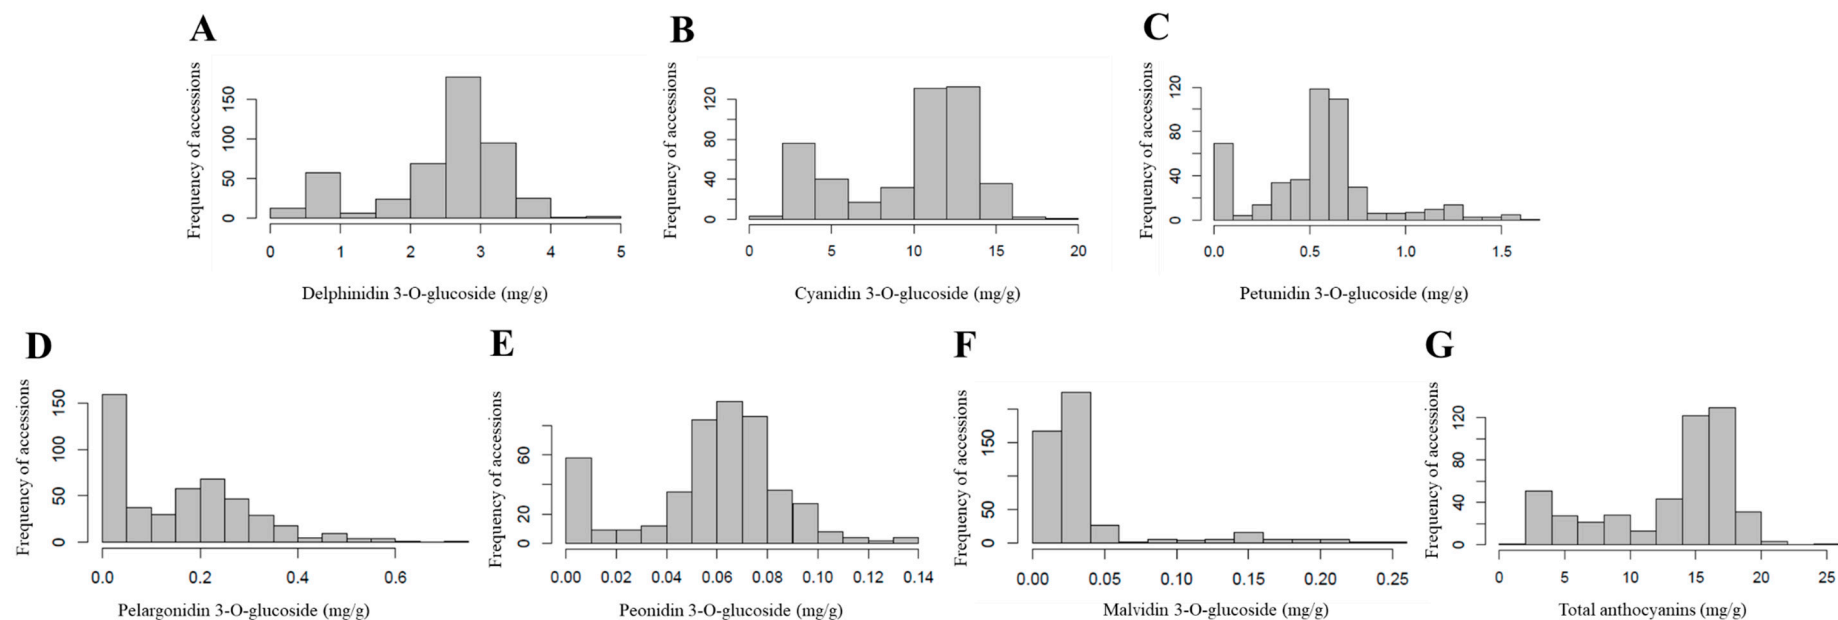

**Figure S2.** Frequency distribution of an average of six anthocyanin content and sum of total anthocyanin contents in 469 accessions over three years. (A) Delphinidin 3-O-glucoside (B) Cyanidin 3-O-glucoside (C) Petunidin 3-O-glucoside (D) Pelargonidin 3-O-glucoside (E) Peonidin 3-O-glucoside (F) Malvidin 3-O-glucoside (G) Total anthocyanins
