# Supplementary material
Source: MDPI journal article supplement (https://www.mdpi.com/2073-4395/11/3/581)
Supplement: s1 [file s1 › Supplementary tables_proofreading.xlsx]

## Sheet: Table S1
Table S1. List of 470 soybean accessions, subpopulation, core collection and genotype of D1, D2 and PsbM allele
Name	IT number	Subpopulation	Core collection	D1 genotype	D2 genotype	PsbM genotype	Breeding line or landrace	Origin of nation	Collection date
BLG1	IT213183	2	-	Wild type	Wild type	psbM	Breeding line	Korea, South	2002-04-30
BLG2	IT161904	2	-	d1	d2	Wild type	PI84578	Korea, South	1989-01-01
BLG3	IT161905	2	-	d1	d2	Wild type	PI84579	Korea, South	1989-01-01
BLG4	IT162155	2	-	d1	d2	Wild type	PI87628	Japan	1989-01-01
BLG5	IT162593	2	-	d1	d2	Wild type	PI96188	China	1989-01-01
BLG6	IT186035	3 (light blue)	-	d1	d2	Wild type	Landrace	Korea, South	1994-01-01
BLG7	IT162602	2	Core collection	d1	d2	Wild type	PI96322	Korea, North	1989-01-01
BLG8	IT177285	3 (light blue)	-	d1	d2	Wild type	Landrace	Korea, South	1992-01-01
BLG9	IT177318	3 (light blue)	-	d1	d2	Wild type	Landrace	Korea, South	1992-01-01
BLG10	IT177325	3 (light blue)	-	d1	d2	Wild type	Landrace	Korea, South	1992-01-01
BLG11	IT177326	3 (light blue)	-	d1	d2	Wild type	Landrace	Korea, South	1992-01-01
BLG12	IT177376	3 (light blue)	-	d1	d2	Wild type	Landrace	Korea, South	1992-01-01
BLG13	IT177419	3 (light blue)	-	d1	d2	Wild type	Landrace	Korea, South	1992-01-01
BLG14	IT186045	3 (light blue)	-	d1	d2	Wild type	Landrace	Korea, South	1994-01-01
BLG15	IT186071	3 (light blue)	-	d1	d2	Wild type	Landrace	Korea, South	1994-01-01
BLG17	IT191145	3 (light blue)	-	d1	d2	Wild type	Landrace	Korea, South	1995-01-01
BLG18	IT191160	3 (light blue)	-	d1	d2	Wild type	Landrace	Korea, South	1995-01-01
BLG19	IT195204	3 (light blue)	-	d1	d2	Wild type	Landrace	Korea, South	1995-01-01
BLG20	IT213193	2	-	Wild type	Wild type	psbM	Breeding line	Korea, South	2002-04-30
BLG21	IT161934	2	Core collection	d1	d2	Wild type	PI84673	Korea, South	1989-01-01
BLG22	IT189665	3 (light blue)	-	d1	d2	Wild type	Landrace	Korea, South	1995-01-01
BLG23	IT213186	2	-	Wild type	Wild type	psbM	Breeding line	Korea, South	2002-04-30
BLG25	IT177300	3 (light blue)	-	d1	d2	Wild type	Landrace	Korea, South	1992-01-01
BLG26	IT195229	3 (light blue)	-	d1	d2	Wild type	Landrace	Korea, South	1995-01-01
BLG27	IT186023	3 (light blue)	-	d1	d2	Wild type	Landrace	Korea, South	1994-01-01
BLG28	IT186034	3 (light blue)	-	d1	d2	Wild type	Landrace	Korea, South	1994-01-01
BLG29	IT186057	3 (light blue)	-	d1	d2	Wild type	Landrace	Korea, South	1994-01-01
BLG30	IT186060	3 (light blue)	-	d1	d2	Wild type	Landrace	Korea, South	1994-01-01
BLG31	IT186094	3 (light blue)	-	d1	d2	Wild type	Landrace	Korea, South	1994-01-01
BLG32	IT186094	3 (light blue)	-	d1	d2	Wild type	Landrace	Korea, South	1994-01-01
BLG33	IT186105	3 (light blue)	-	d1	d2	Wild type	Landrace	Korea, South	1994-01-01
BLG34	IT186110	3 (light blue)	-	d1	d2	Wild type	Landrace	Korea, South	1994-01-01
BLG35	IT186111	3 (light blue)	-	d1	d2	Wild type	Landrace	Korea, South	1994-01-01
BLG36	IT213192	2	-	Wild type	Wild type	psbM	Breeding line	Korea, South	2002-04-30
BLG37	IT213192	2	Core collection	Wild type	Wild type	psbM	Breeding line	Korea, South	2002-04-30
BLG38	IT219709	2	Core collection	d1	d2	Wild type	Landrace	Korea, South	2007-06-21
BLG39	IT224435	3 (light blue)	-	d1	d2	Wild type	Landrace	Korea, South	2009-12-16
BLG40	IT224517	3 (light blue)	-	d1	d2	Wild type	Landrace	Korea, South	2009-12-16
BLG41	IT177210	2	Core collection	d1	d2	Wild type	Landrace	Korea, South	1992-01-01
BLG42	IT177403	3 (light blue)	-	d1	d2	Wild type	Landrace	Korea, South	1992-01-01
BLG43	IT177412	3 (light blue)	-	d1	d2	Wild type	Landrace	Korea, South	1992-01-01
BLG44	IT177425	3 (light blue)	-	d1	d2	Wild type	Landrace	Korea, South	1992-01-01
BLG45	IT177431	3 (light blue)	-	d1	d2	Wild type	Landrace	Korea, South	1992-01-01
BLG46	IT180854	3 (light blue)	-	d1	d2	Wild type	Landrace	Korea, South	1993-01-01
BLG47	IT186059	3 (light blue)	-	d1	d2	Wild type	Landrace	Korea, South	1994-01-01
BLG48	IT186122	3 (light blue)	-	d1	d2	Wild type	Landrace	Korea, South	1994-01-01
BLG49	IT189264	3 (light blue)	-	d1	d2	Wild type	Landrace	Korea, South	1995-01-01
BLG50	IT189640	3 (light blue)	-	d1	d2	Wild type	Landrace	Korea, South	1995-01-01
BLG51	IT189640	3 (light blue)	-	d1	d2	Wild type	Landrace	Korea, South	1995-01-01
BLG52	IT195341	3 (light blue)	-	d1	d2	Wild type	Landrace	Korea, South	1996-01-01
BLG53	IT195522	3 (light blue)	-	d1	d2	Wild type	Landrace	Korea, South	1996-01-01
BLG54	IT195627	3 (light blue)	-	d1	d2	Wild type	Landrace	Korea, South	1996-01-01
BLG55	IT196434	3 (light blue)	-	d1	d2	Wild type	Landrace	Korea, South	1996-01-01
BLG56	IT141511	3 (light blue)	-	d1	d2	Wild type	Landrace	Korea, South	1987-01-01
BLG57	IT177237	3 (light blue)	-	d1	d2	Wild type	Landrace	Korea, South	1992-01-01
BLG58	IT177305	3 (light blue)	-	d1	d2	Wild type	Landrace	Korea, South	1992-01-01
BLG59	IT177320	3 (light blue)	-	d1	d2	Wild type	Landrace	Korea, South	1992-01-01
BLG60	IT177340	3 (light blue)	-	d1	d2	Wild type	Landrace	Korea, South	1992-01-01
BLG61	IT177351	3 (light blue)	-	d1	d2	Wild type	Landrace	Korea, South	1992-01-01
BLG62	IT177361	3 (light blue)	-	d1	d2	Wild type	Landrace	Korea, South	1992-01-01
BLG63	IT177366	3 (light blue)	-	d1	d2	Wild type	Landrace	Korea, South	1992-01-01
BLG64	IT177367	3 (light blue)	-	d1	d2	Wild type	Landrace	Korea, South	1992-01-01
BLG65	IT177387	3 (light blue)	-	d1	d2	Wild type	Landrace	Korea, South	1992-01-01
BLG66	IT177405	3 (light blue)	-	d1	d2	Wild type	Landrace	Korea, South	1992-01-01
BLG67	IT177415	3 (light blue)	-	d1	d2	Wild type	Landrace	Korea, South	1992-01-01
BLG68	IT177420	3 (light blue)	-	d1	d2	Wild type	Landrace	Korea, South	1992-01-01
BLG69	IT177456	3 (light blue)	-	d1	d2	Wild type	Landrace	Korea, South	1992-01-01
BLG70	IT186055	3 (light blue)	Core collection	d1	d2	Wild type	Landrace	Korea, South	1994-01-01
BLG71	IT186158	3 (dark blue)	-	Wild type	Wild type	psbM	Landrace	Korea, South	1994-01-01
BLG72	IT189316	3 (light blue)	-	d1	d2	Wild type	Landrace	Korea, South	1995-01-01
BLG73	IT191126	3 (light blue)	-	d1	d2	Wild type	Landrace	Korea, South	1995-01-01
BLG74	IT191135	3 (light blue)	-	d1	d2	Wild type	Landrace	Korea, South	1995-01-01
BLG75	IT191649	3 (light blue)	-	d1	d2	Wild type	Landrace	Korea, South	1995-01-01
BLG76	IT195198	3 (light blue)	-	d1	d2	Wild type	Landrace	Korea, South	1995-01-01
BLG77	IT195508	3 (light blue)	-	d1	d2	Wild type	Landrace	Korea, South	1996-01-01
BLG78	IT196847	1	-	Wild type	Wild type	psbM	Landrace	Korea, South	1996-01-01
BLG79	IT115797	2	-	Wild type	Wild type	psbM	Landrace	Korea, South	1986-01-01
BLG80	IT175932	3 (light blue)	-	d1	d2	Wild type	Landrace	Korea, South	1992-01-01
BLG81	IT177712	1	-	Wild type	Wild type	psbM	Landrace	Korea, South	1992-01-01
BLG82	IT177712	2	Core collection	d1	d2	Wild type	Landrace	Korea, South	1992-01-01
BLG83	IT177829	1	-	Wild type	Wild type	psbM	Landrace	Korea, South	1992-01-01
BLG84	IT177829	1	-	Wild type	Wild type	psbM	Landrace	Korea, South	1992-01-01
BLG85	IT177832	1	-	Wild type	Wild type	psbM	Landrace	Korea, South	1992-01-01
BLG86	IT177832	1	-	Wild type	Wild type	psbM	Landrace	Korea, South	1992-01-01
BLG87	IT177909	1	-	Wild type	Wild type	psbM	Landrace	Korea, South	1992-01-01
BLG88	IT186089	2	-	Wild type	Wild type	psbM	Landrace	Korea, South	1994-01-01
BLG89	IT186238	3 (light blue)	-	d1	d2	Wild type	Landrace	Korea, South	1994-01-01
BLG91	IT189217	2	-	Wild type	Wild type	psbM	Landrace	Korea, South	1995-01-01
BLG92	IT203576	2	-	Wild type	Wild type	psbM	Breeding line	Korea, South	1997-01-01
BLG93	IT210089	3 (dark blue)	-	Wild type	Wild type	psbM	Landrace	Korea, South	1999-01-01
BLG94	IT219701	3 (dark blue)	-	Wild type	Wild type	psbM	Landrace	Korea, South	2007-06-21
BLG95	IT219704	3 (dark blue)	-	Wild type	Wild type	psbM	Landrace	Korea, South	2007-06-21
BLG96	IT225110	3 (dark blue)	-	Wild type	Wild type	psbM	Landrace	Korea, South	2009-12-16
BLG97	IT228631	3 (light blue)	-	d1	d2	Wild type	Landrace	Korea, South	2010-07-02
BLG98	IT194548	1	-	Wild type	Wild type	psbM	Landrace	Korea, South	1995-01-01
BLG99	IT194556	1	-	Wild type	Wild type	psbM	Landrace	Korea, South	1995-01-01
BLG100	IT194568	1	-	Wild type	Wild type	psbM	Landrace	Korea, South	1995-01-01
BLG101	IT195330	1	-	Wild type	Wild type	psbM	Landrace	Korea, South	1996-01-01
BLG102	IT195330	1	-	Wild type	Wild type	psbM	Landrace	Korea, South	1996-01-01
BLG103	IT196848	1	-	Wild type	Wild type	psbM	Landrace	Korea, South	1996-01-01
BLG104	IT196887	3 (light blue)	-	d1	d2	Wild type	Landrace	Korea, South	1996-01-01
BLG105	IT209383	1	-	Wild type	Wild type	psbM	Landrace	Korea, South	1999-01-01
BLG106	IT216023	3 (light blue)	-	d1	d2	Wild type	Breeding line	Korea, South	2004-06-30
BLG107	IT178512	1	-	Wild type	Wild type	psbM	Landrace	Korea, South	1993-01-01
BLG108	IT178739	1	-	Wild type	Wild type	psbM	Landrace	Korea, South	1993-01-01
BLG109	IT178751	1	-	Wild type	Wild type	psbM	Landrace	Korea, South	1993-01-01
BLG110	IT180621	2	Core collection	Wild type	Wild type	psbM	Landrace	Korea, South	1993-01-01
BLG111	IT186026	3 (light blue)	-	d1	d2	Wild type	Landrace	Korea, South	1994-01-01
BLG112	IT186084	1	-	Wild type	Wild type	psbM	Landrace	Korea, South	1994-01-01
BLG113	IT186163	1	-	Wild type	Wild type	psbM	Landrace	Korea, South	1994-01-01
BLG114	IT186205	1	-	Wild type	Wild type	psbM	Landrace	Korea, South	1994-01-01
BLG115	IT186212	3 (light blue)	-	d1	d2	Wild type	Landrace	Korea, South	1994-01-01
BLG116	IT186215	1	-	Wild type	Wild type	psbM	Landrace	Korea, South	1994-01-01
BLG117	IT186226	1	-	Wild type	Wild type	psbM	Landrace	Korea, South	1994-01-01
BLG118	IT186232	3 (light blue)	-	d1	d2	Wild type	Landrace	Korea, South	1994-01-01
BLG119	IT105500	1	-	Wild type	Wild type	psbM	Landrace	Korea, South	1985-01-01
BLG120	IT113044	2	-	Wild type	Wild type	psbM	Landrace	Korea, South	1985-01-01
BLG121	IT142935	1	-	Wild type	Wild type	psbM	Landrace	Korea, South	1987-01-01
BLG122	IT143119	1	-	Wild type	Wild type	psbM	Landrace	Korea, South	1987-01-01
BLG123	IT143174	1	-	Wild type	Wild type	psbM	Landrace	Korea, South	1987-01-01
BLG124	IT153438	2	Core collection	Wild type	Wild type	psbM	Landrace	Korea, South	1988-01-01
BLG125	IT160157	1	-	Wild type	Wild type	psbM	Landrace	Korea, South	1989-01-01
BLG126	IT160586	1	-	Wild type	Wild type	psbM	Landrace	Korea, South	1989-01-01
BLG127	IT175855	1	-	Wild type	Wild type	psbM	Landrace	Korea, South	1992-01-01
BLG128	IT175866	1	-	Wild type	Wild type	psbM	Landrace	Korea, South	1992-01-01
BLG129	IT177439	1	-	Wild type	Wild type	psbM	Landrace	Korea, South	1992-01-01
BLG130	IT177852	1	-	Wild type	Wild type	psbM	Landrace	Korea, South	1992-01-01
BLG131	IT186027	3 (light blue)	-	d1	d2	Wild type	Landrace	Korea, South	1994-01-01
BLG132	IT186058	2	Core collection	Wild type	Wild type	psbM	Landrace	Korea, South	1994-01-01
BLG133	IT186093	1	-	Wild type	Wild type	psbM	Landrace	Korea, South	1994-01-01
BLG134	IT186101	2	-	Wild type	Wild type	psbM	Landrace	Korea, South	1994-01-01
BLG135	IT186154	1	-	Wild type	Wild type	psbM	Landrace	Korea, South	1994-01-01
BLG136	IT189212	1	-	Wild type	Wild type	psbM	Landrace	Korea, South	1995-01-01
BLG137	IT189214	1	-	Wild type	Wild type	psbM	Landrace	Korea, South	1995-01-01
BLG138	IT189254	1	-	Wild type	Wild type	psbM	Landrace	Korea, South	1995-01-01
BLG139	IT189256	2	-	Wild type	Wild type	psbM	Landrace	Korea, South	1995-01-01
BLG140	IT194547	1	-	Wild type	Wild type	psbM	Landrace	Korea, South	1995-01-01
BLG141	IT194562	2	-	Wild type	Wild type	psbM	Landrace	Korea, South	1995-01-01
BLG142	IT195020	1	-	Wild type	Wild type	psbM	Landrace	Korea, South	1995-01-01
BLG143	IT195624	1	-	Wild type	Wild type	psbM	Landrace	Korea, South	1996-01-01
BLG144	IT195628	1	-	Wild type	Wild type	psbM	Landrace	Korea, South	1996-01-01
BLG145	IT195629	2	-	Wild type	Wild type	psbM	Landrace	Korea, South	1996-01-01
BLG146	IT196819	2	-	Wild type	Wild type	psbM	Landrace	Korea, South	1996-01-01
BLG147	IT196845	1	-	Wild type	Wild type	psbM	Landrace	Korea, South	1996-01-01
BLG148	IT203582	1	-	Wild type	Wild type	psbM	Breeding line	Korea, South	1997-01-01
BLG149	IT203723	3 (light blue)	-	d1	d2	Wild type	Landrace	Korea, South	1997-01-01
BLG150	IT204078	1	-	Wild type	Wild type	psbM	Landrace	Korea, South	1997-01-01
BLG151	IT204081	1	-	Wild type	Wild type	psbM	Landrace	Korea, South	1997-01-01
BLG152	IT209356	1	-	Wild type	Wild type	psbM	Landrace	Korea, South	1999-01-01
BLG153	IT210088	1	-	Wild type	Wild type	psbM	Landrace	Korea, South	1999-01-01
BLG154	IT219702	2	-	Wild type	Wild type	psbM	Landrace	Korea, South	2007-06-21
BLG155	IT219707	1	-	Wild type	Wild type	psbM	Landrace	Korea, South	2007-06-21
BLG156	IT224172	1	-	Wild type	Wild type	psbM	Landrace	Korea, South	2009-12-16
BLG157	IT224177	1	-	Wild type	Wild type	psbM	Landrace	Korea, South	2009-12-16
BLG158	IT224177	1	-	Wild type	Wild type	psbM	Landrace	Korea, South	2009-12-16
BLG159	IT224192	1	-	Wild type	Wild type	psbM	Landrace	Korea, South	2009-12-16
BLG160	IT224211	1	-	Wild type	Wild type	psbM	Landrace	Korea, South	2009-12-16
BLG161	IT224415	1	-	Wild type	Wild type	psbM	Landrace	Korea, South	2009-12-16
BLG162	IT228629	2	-	Wild type	Wild type	psbM	Landrace	Korea, South	2010-07-02
BLG163	IT228789	2	-	Wild type	Wild type	psbM	Landrace	Korea, South	2010-07-02
BLG164	IT228789	2	-	Wild type	Wild type	psbM	Landrace	Korea, South	2010-07-02
BLG165	IT230132	1	-	Wild type	Wild type	psbM	Landrace	Korea, South	2010-10-04
BLG166	IT177440	1	-	Wild type	Wild type	psbM	Landrace	Korea, South	1992-01-01
BLG167	IT177472	1	-	Wild type	Wild type	psbM	Landrace	Korea, South	1992-01-01
BLG168	IT177819	1	-	Wild type	Wild type	psbM	Landrace	Korea, South	1992-01-01
BLG169	IT177854	1	-	Wild type	Wild type	psbM	Landrace	Korea, South	1992-01-01
BLG170	IT177858	2	-	Wild type	Wild type	psbM	Landrace	Korea, South	1992-01-01
BLG171	IT177888	1	-	Wild type	Wild type	psbM	Landrace	Korea, South	1992-01-01
BLG172	IT177888	1	-	Wild type	Wild type	psbM	Landrace	Korea, South	1992-01-01
BLG173	IT177915	1	-	Wild type	Wild type	psbM	Landrace	Korea, South	1992-01-01
BLG174	IT177925	1	-	Wild type	Wild type	psbM	Landrace	Korea, South	1992-01-01
BLG175	IT177938	1	-	Wild type	Wild type	psbM	Landrace	Korea, South	1992-01-01
BLG176	IT177945	2	-	Wild type	Wild type	psbM	Landrace	Korea, South	1992-01-01
BLG177	IT177978	1	-	Wild type	Wild type	psbM	Landrace	Korea, South	1992-01-01
BLG178	IT177978	1	-	Wild type	Wild type	psbM	Landrace	Korea, South	1992-01-01
BLG179	IT178376	1	-	Wild type	Wild type	psbM	Landrace	Korea, South	1993-01-01
BLG181	IT180860	1	-	Wild type	Wild type	psbM	Landrace	Korea, South	1993-01-01
BLG182	IT186030	1	-	Wild type	Wild type	psbM	Landrace	Korea, South	1994-01-01
BLG183	IT186040	1	-	Wild type	Wild type	psbM	Landrace	Korea, South	1994-01-01
BLG184	IT186043	1	-	Wild type	Wild type	psbM	Landrace	Korea, South	1994-01-01
BLG185	IT186138	1	-	Wild type	Wild type	psbM	Landrace	Korea, South	1994-01-01
BLG186	IT186207	1	-	Wild type	Wild type	psbM	Landrace	Korea, South	1994-01-01
BLG187	IT189223	2	-	Wild type	Wild type	psbM	Landrace	Korea, South	1995-01-01
BLG188	IT189224	2	-	Wild type	Wild type	psbM	Landrace	Korea, South	1995-01-01
BLG189	IT189238	1	-	Wild type	Wild type	psbM	Landrace	Korea, South	1995-01-01
BLG190	IT189259	1	-	Wild type	Wild type	psbM	Landrace	Korea, South	1995-01-01
BLG191	IT189261	2	Core collection	Wild type	Wild type	psbM	Landrace	Korea, South	1995-01-01
BLG192	IT191120	1	-	Wild type	Wild type	psbM	Landrace	Korea, South	1995-01-01
BLG193	IT191169	1	-	Wild type	Wild type	psbM	Landrace	Korea, South	1995-01-01
BLG194	IT194536	1	-	Wild type	Wild type	psbM	Landrace	Korea, South	1995-01-01
BLG195	IT194538	1	-	Wild type	Wild type	psbM	Landrace	Korea, South	1995-01-01
BLG196	IT194546	1	-	Wild type	Wild type	psbM	Landrace	Korea, South	1995-01-01
BLG197	IT108780	1	-	Wild type	Wild type	psbM	Landrace	Korea, South	1985-01-01
BLG198	IT153770	1	-	Wild type	Wild type	psbM	Landrace	Korea, South	1988-01-01
BLG199	IT153780	1	-	Wild type	Wild type	psbM	Landrace	Korea, South	1988-01-01
BLG200	IT160127	2	Core collection	Wild type	Wild type	psbM	Landrace	Korea, South	1989-01-01
BLG201	IT160153	1	-	Wild type	Wild type	psbM	Landrace	Korea, South	1989-01-01
BLG202	IT175792	2	-	Wild type	Wild type	psbM	Landrace	Korea, South	1992-01-01
BLG203	IT175818	1	-	Wild type	Wild type	psbM	Landrace	Korea, South	1992-01-01
BLG204	IT177284	2	-	Wild type	Wild type	psbM	Landrace	Korea, South	1992-01-01
BLG205	IT177879	1	-	Wild type	Wild type	psbM	Landrace	Korea, South	1992-01-01
BLG206	IT177926	2	-	Wild type	Wild type	psbM	Landrace	Korea, South	1992-01-01
BLG207	IT178116	1	-	Wild type	Wild type	psbM	Landrace	Korea, South	1992-01-01
BLG208	IT180851	1	-	Wild type	Wild type	psbM	Landrace	Korea, South	1993-01-01
BLG209	IT180852	1	-	Wild type	Wild type	psbM	Landrace	Korea, South	1993-01-01
BLG210	IT180857	1	-	Wild type	Wild type	psbM	Landrace	Korea, South	1993-01-01
BLG211	IT181665	1	-	Wild type	Wild type	psbM	Landrace	Korea, South	1993-01-01
BLG212	IT181891	1	-	Wild type	Wild type	psbM	Landrace	Korea, South	1993-01-01
BLG213	IT181941	1	-	Wild type	Wild type	psbM	Landrace	Korea, South	1993-01-01
BLG214	IT181945	1	-	Wild type	Wild type	psbM	Landrace	Korea, South	1993-01-01
BLG215	IT181945	1	-	Wild type	Wild type	psbM	Landrace	Korea, South	1993-01-01
BLG216	IT186149	2	-	Wild type	Wild type	psbM	Landrace	Korea, South	1994-01-01
BLG217	IT186149	2	-	Wild type	Wild type	psbM	Landrace	Korea, South	1994-01-01
BLG218	IT186222	1	-	Wild type	Wild type	psbM	Landrace	Korea, South	1994-01-01
BLG219	IT189215	1	-	Wild type	Wild type	psbM	Landrace	Korea, South	0
BLG220	IT189225	1	-	Wild type	Wild type	psbM	Landrace	Korea, South	1995-01-01
BLG221	IT191115	1	-	Wild type	Wild type	psbM	Landrace	Korea, South	1995-01-01
BLG222	IT194544	1	-	Wild type	Wild type	psbM	Landrace	Korea, South	1995-01-01
BLG223	IT194567	1	-	Wild type	Wild type	psbM	Landrace	Korea, South	1995-01-01
BLG224	IT194567	1	-	Wild type	Wild type	psbM	Landrace	Korea, South	1995-01-01
BLG226	IT196826	1	-	Wild type	Wild type	psbM	Landrace	Korea, South	1996-01-01
BLG227	IT196826	1	-	Wild type	Wild type	psbM	Landrace	Korea, South	1996-01-01
BLG228	IT208522	1	-	Wild type	Wild type	psbM	Landrace	Korea, South	1999-01-01
BLG229	IT208522	1	-	Wild type	Wild type	psbM	Landrace	Korea, South	1999-01-01
BLG230	IT213320	1	-	Wild type	Wild type	psbM	Landrace	Korea, South	2002-11-27
BLG231	IT219694	1	-	Wild type	Wild type	psbM	Landrace	Korea, South	2007-06-21
BLG232	IT219700	2	-	Wild type	Wild type	psbM	Landrace	Korea, South	2007-06-21
BLG233	IT228785	2	-	Wild type	Wild type	psbM	Landrace	Korea, South	2010-07-02
BLG234	IT228785	2	Core collection	Wild type	Wild type	psbM	Landrace	Korea, South	2010-07-02
BLG235	IT228787	2	Core collection	Wild type	Wild type	psbM	Landrace	Korea, South	2010-07-02
BLG236	IT228791	1	-	Wild type	Wild type	psbM	Landrace	Korea, South	2010-07-02
BLG239	IT103162	1	-	Wild type	Wild type	psbM	Landrace	Korea, South	1985-01-01
BLG240	IT104617	3 (light blue)	-	d1	d2	Wild type	Landrace	Korea, South	1985-01-01
BLG241	IT153439	1	-	Wild type	Wild type	psbM	Landrace	Korea, South	1988-01-01
BLG242	IT153440	1	-	Wild type	Wild type	psbM	Landrace	Korea, South	1988-01-01
BLG243	IT153440	1	-	Wild type	Wild type	psbM	Landrace	Korea, South	1988-01-01
BLG246	IT162905	1	-	Wild type	Wild type	psbM	Landrace	Korea, South	1989-01-01
BLG247	IT177203	3 (light blue)	-	d1	d2	Wild type	Landrace	Korea, South	1992-01-01
BLG248	IT177218	1	-	Wild type	Wild type	psbM	Landrace	Korea, South	1992-01-01
BLG249	IT177235	3 (light blue)	-	d1	d2	Wild type	Landrace	Korea, South	1992-01-01
BLG250	IT177249	1	-	Wild type	Wild type	psbM	Landrace	Korea, South	1992-01-01
BLG251	IT177254	1	-	Wild type	Wild type	psbM	Landrace	Korea, South	1992-01-01
BLG252	IT177331	3 (light blue)	-	d1	d2	Wild type	Landrace	Korea, South	1992-01-01
BLG253	IT177332	1	-	Wild type	Wild type	psbM	Landrace	Korea, South	1992-01-01
BLG254	IT177363	3 (light blue)	-	d1	d2	Wild type	Landrace	Korea, South	1992-01-01
BLG255	IT177369	1	-	Wild type	Wild type	psbM	Landrace	Korea, South	1992-01-01
BLG256	IT177421	1	-	Wild type	Wild type	psbM	Landrace	Korea, South	1992-01-01
BLG257	IT177443	1	-	Wild type	Wild type	psbM	Landrace	Korea, South	1992-01-01
BLG258	IT177454	3 (light blue)	-	d1	d2	Wild type	Landrace	Korea, South	1992-01-01
BLG259	IT177466	1	-	Wild type	Wild type	psbM	Landrace	Korea, South	1992-01-01
BLG260	IT177475	3 (light blue)	-	d1	d2	Wild type	Landrace	Korea, South	1992-01-01
BLG261	IT177475	1	-	Wild type	Wild type	psbM	Landrace	Korea, South	1992-01-01
BLG262	IT177484	1	-	Wild type	Wild type	psbM	Landrace	Korea, South	1992-01-01
BLG263	IT177503	1	-	Wild type	Wild type	psbM	Landrace	Korea, South	1992-01-01
BLG264	IT177543	1	-	Wild type	Wild type	psbM	Landrace	Korea, South	1992-01-01
BLG265	IT177545	1	-	Wild type	Wild type	psbM	Landrace	Korea, South	1992-01-01
BLG266	IT177549	1	-	Wild type	Wild type	psbM	Landrace	Korea, South	1992-01-01
BLG267	IT177558	1	-	Wild type	Wild type	psbM	Landrace	Korea, South	1992-01-01
BLG270	IT177562	1	-	Wild type	Wild type	psbM	Landrace	Korea, South	1992-01-01
BLG271	IT177567	1	-	Wild type	Wild type	psbM	Landrace	Korea, South	1992-01-01
BLG273	IT177567	1	-	Wild type	Wild type	psbM	Landrace	Korea, South	1992-01-01
BLG274	IT177571	1	-	Wild type	Wild type	psbM	Landrace	Korea, South	1992-01-01
BLG275	IT177609	1	-	Wild type	Wild type	psbM	Landrace	Korea, South	1992-01-01
BLG276	IT177609	1	-	Wild type	Wild type	psbM	Landrace	Korea, South	1992-01-01
BLG277	IT177616	1	-	Wild type	Wild type	psbM	Landrace	Korea, South	1992-01-01
BLG278	IT177664	1	-	Wild type	Wild type	psbM	Landrace	Korea, South	1992-01-01
BLG281	IT177670	2	-	Wild type	Wild type	psbM	Landrace	Korea, South	1992-01-01
BLG283	IT177716	1	-	Wild type	Wild type	psbM	Landrace	Korea, South	1992-01-01
BLG284	IT177716	1	-	Wild type	Wild type	psbM	Landrace	Korea, South	1992-01-01
BLG285	IT177778	1	-	Wild type	Wild type	psbM	Landrace	Korea, South	1992-01-01
BLG286	IT177818	1	-	Wild type	Wild type	psbM	Landrace	Korea, South	1992-01-01
BLG287	IT177826	2	Core collection	Wild type	Wild type	psbM	Landrace	Korea, South	1992-01-01
BLG290	IT177835	1	-	Wild type	Wild type	psbM	Landrace	Korea, South	1992-01-01
BLG291	IT177835	1	-	Wild type	Wild type	psbM	Landrace	Korea, South	1992-01-01
BLG292	IT177836	1	-	Wild type	Wild type	psbM	Landrace	Korea, South	1992-01-01
BLG293	IT177857	1	-	Wild type	Wild type	psbM	Landrace	Korea, South	1992-01-01
BLG294	IT177861	1	-	Wild type	Wild type	psbM	Landrace	Korea, South	1992-01-01
BLG295	IT177863	1	-	Wild type	Wild type	psbM	Landrace	Korea, South	1992-01-01
BLG296	IT177873	1	-	Wild type	Wild type	psbM	Landrace	Korea, South	1992-01-01
BLG297	IT177876	1	-	Wild type	Wild type	psbM	Landrace	Korea, South	1992-01-01
BLG298	IT177878	1	-	Wild type	Wild type	psbM	Landrace	Korea, South	1992-01-01
BLG299	IT177890	3 (light blue)	-	d1	d2	Wild type	Landrace	Korea, South	1992-01-01
BLG300	IT177890	1	-	Wild type	Wild type	psbM	Landrace	Korea, South	1992-01-01
BLG301	IT177895	1	-	Wild type	Wild type	psbM	Landrace	Korea, South	1992-01-01
BLG302	IT177897	1	-	Wild type	Wild type	psbM	Landrace	Korea, South	1992-01-01
BLG303	IT177898	1	-	Wild type	Wild type	psbM	Landrace	Korea, South	1992-01-01
BLG304	IT177902	1	-	Wild type	Wild type	psbM	Landrace	Korea, South	1992-01-01
BLG305	IT177904	1	-	Wild type	Wild type	psbM	Landrace	Korea, South	1992-01-01
BLG306	IT177907	1	-	Wild type	Wild type	psbM	Landrace	Korea, South	1992-01-01
BLG307	IT177914	1	-	Wild type	Wild type	psbM	Landrace	Korea, South	1992-01-01
BLG308	IT177917	1	-	Wild type	Wild type	psbM	Landrace	Korea, South	1992-01-01
BLG309	IT177954	1	-	Wild type	Wild type	psbM	Landrace	Korea, South	1992-01-01
BLG310	IT177958	1	-	Wild type	Wild type	psbM	Landrace	Korea, South	1992-01-01
BLG311	IT177974	1	-	Wild type	Wild type	psbM	Landrace	Korea, South	1992-01-01
BLG312	IT177980	1	-	Wild type	Wild type	psbM	Landrace	Korea, South	1992-01-01
BLG313	IT177985	1	-	Wild type	Wild type	psbM	Landrace	Korea, South	1992-01-01
BLG315	IT177998	1	-	Wild type	Wild type	psbM	Landrace	Korea, South	1992-01-01
BLG316	IT178004	1	-	Wild type	Wild type	psbM	Landrace	Korea, South	1992-01-01
BLG317	IT178010	1	-	Wild type	Wild type	psbM	Landrace	Korea, South	1992-01-01
BLG319	IT178015	1	-	Wild type	Wild type	psbM	Landrace	Korea, South	1992-01-01
BLG320	IT178020	1	-	Wild type	Wild type	psbM	Landrace	Korea, South	1992-01-01
BLG321	IT178031	1	-	Wild type	Wild type	psbM	Landrace	Korea, South	1992-01-01
BLG322	IT178034	1	-	Wild type	Wild type	psbM	Landrace	Korea, South	1992-01-01
BLG323	IT178045	1	-	Wild type	Wild type	psbM	Landrace	Korea, South	1992-01-01
BLG324	IT178086	1	-	Wild type	Wild type	psbM	Landrace	Korea, South	1992-01-01
BLG325	IT178108	1	-	Wild type	Wild type	psbM	Landrace	Korea, South	1992-01-01
BLG326	IT178108	1	-	Wild type	Wild type	psbM	Landrace	Korea, South	1992-01-01
BLG327	IT180856	1	-	Wild type	Wild type	psbM	Landrace	Korea, South	1993-01-01
BLG328	IT186133	1	-	Wild type	Wild type	psbM	Landrace	Korea, South	1994-01-01
BLG329	IT208786	1	-	Wild type	Wild type	psbM	Landrace	Korea, South	1999-01-01
BLG330	IT208787	2	Core collection	Wild type	Wild type	psbM	Landrace	Korea, South	1999-01-01
BLG331	IT208787	1	-	Wild type	Wild type	psbM	Landrace	Korea, South	1999-01-01
BLG332	IT211784	3 (light blue)	-	d1	d2	Wild type	Landrace	Korea, South	2000-09-01
BLG333	IT212805	1	-	Wild type	Wild type	psbM	Landrace	Korea, South	2001-11-08
BLG334	IT213033	2	-	Wild type	Wild type	psbM	Breeding line	Korea, South	2002-03-28
BLG335	IT215992	1	-	Wild type	Wild type	psbM	Landrace	Korea, South	2004-06-30
BLG336	IT224518	3 (light blue)	-	d1	d2	Wild type	Landrace	Korea, South	2009-12-16
BLG337	IT224537	3 (light blue)	-	d1	d2	Wild type	Landrace	Korea, South	2009-12-16
BLG338	IT237550	2	-	d1	d2	Wild type	Landrace	Korea, South	2011-07-04
BLG339	IT252498	1	-	Wild type	Wild type	psbM	Landrace	Korea, South	2012-06-26
BLG341	IT252530	1	Core collection	Wild type	Wild type	psbM	Landrace	Korea, South	2012-06-26
BLG342	IT252540	1	-	Wild type	Wild type	psbM	Landrace	Korea, South	2012-06-26
BLG343	IT252541	1	-	Wild type	Wild type	psbM	Landrace	Korea, South	2012-06-26
BLG344	IT262881	1	-	Wild type	Wild type	psbM	Landrace	Korea, South	2012-12-27
BLG345	IT262882	2	-	Wild type	Wild type	psbM	Landrace	Korea, South	2012-12-27
BLG346	IT262882	2	-	Wild type	Wild type	psbM	Landrace	Korea, South	2012-12-27
BLG347	IT262883	1	-	Wild type	Wild type	psbM	Landrace	Korea, South	2012-12-27
BLG348	IT262894	2	-	Wild type	Wild type	psbM	.	.	2012-12-27
BLG349	IT262924	2	-	d1	d2	Wild type	.	United States	2012-12-27
BLG350	IT262931	1	-	Wild type	Wild type	psbM	Landrace	Korea, South	2012-12-27
BLG351	IT262932	1	-	Wild type	Wild type	psbM	Landrace	Korea, South	2012-12-27
BLG352	IT262937	3 (light blue)	-	d1	d2	Wild type	.	.	2012-12-27
BLG354	IT262962	1	-	Wild type	Wild type	psbM	.	.	2012-12-27
BLG356	IT263081	2	-	Wild type	Wild type	psbM	Landrace	Korea, South	2012-12-27
BLG357	IT263087	3 (dark blue)	-	Wild type	Wild type	psbM	Landrace	Korea, South	2012-12-27
BLG358	IT263088	3 (dark blue)	-	Wild type	Wild type	psbM	Landrace	Korea, South	2012-12-27
BLG359	IT263100	1	-	Wild type	Wild type	psbM	Landrace	Korea, South	2012-12-27
BLG360	IT263117	1	-	Wild type	Wild type	psbM	Landrace	Korea, South	2012-12-27
BLG361	IT263127	1	-	Wild type	Wild type	psbM	Landrace	Korea, South	2012-12-27
BLG362	IT263129	2	-	Wild type	Wild type	psbM	Landrace	Korea, South	2012-12-27
BLG363	IT263130	1	-	Wild type	Wild type	psbM	Landrace	Korea, South	2012-12-27
BLG364	IT263130	1	-	Wild type	Wild type	psbM	Landrace	Korea, South	2012-12-27
BLG365	IT263142	1	-	Wild type	Wild type	psbM	Landrace	Korea, South	2012-12-27
BLG366	IT263144	1	-	Wild type	Wild type	psbM	Landrace	Korea, South	2012-12-27
BLG367	IT263148	1	-	Wild type	Wild type	psbM	Landrace	Korea, South	2012-12-27
BLG368	IT263149	1	-	Wild type	Wild type	psbM	Landrace	Korea, South	2012-12-27
BLG369	IT263149	1	-	Wild type	Wild type	psbM	Landrace	Korea, South	2012-12-27
BLG370	IT263227	2	-	Wild type	Wild type	psbM	Landrace	Korea, South	2012-12-27
BLG371	IT263227	2	Core collection	Wild type	Wild type	psbM	Landrace	Korea, South	2012-12-27
BLG372	IT263228	3 (dark blue)	-	Wild type	Wild type	psbM	Landrace	Korea, South	2012-12-27
BLG373	IT263232	3 (dark blue)	-	Wild type	Wild type	psbM	Landrace	Korea, South	2012-12-27
BLG374	IT263233	3 (dark blue)	-	Wild type	Wild type	psbM	Landrace	Korea, South	2012-12-27
BLG375	IT263235	3 (dark blue)	-	Wild type	Wild type	psbM	Landrace	Korea, South	2012-12-27
BLG376	IT263237	1	-	Wild type	Wild type	psbM	Landrace	Korea, South	2012-12-27
BLG377	IT263271	1	-	Wild type	Wild type	psbM	Landrace	Korea, South	2012-12-27
BLG378	IT263271	1	-	Wild type	Wild type	psbM	Landrace	Korea, South	2012-12-27
BLG379	IT263274	1	-	Wild type	Wild type	psbM	Landrace	Korea, South	2012-12-27
BLG380	IT263283	3 (light blue)	-	d1	d2	Wild type	.	.	.
BLG381	IT263283	3 (light blue)	-	d1	d2	Wild type	.	.	.
BLG382	IT263284	2	-	Wild type	Wild type	psbM	Landrace	Korea, South	2012-12-27
BLG383	IT263284	1	-	Wild type	Wild type	psbM	Landrace	Korea, South	2012-12-27
BLG384	IT263285	2	-	Wild type	Wild type	psbM	Landrace	Korea, South	2012-12-27
BLG385	IT263294	2	-	Wild type	Wild type	psbM	Landrace	Korea, South	2012-12-27
BLG386	IT263294	2	Core collection	Wild type	Wild type	psbM	Landrace	Korea, South	2012-12-27
BLG387	IT263297	2	-	Wild type	Wild type	psbM	Landrace	Korea, South	2012-12-27
BLG388	IT263319	1	-	Wild type	Wild type	psbM	Landrace	Korea, South	2012-12-27
BLG389	IT263319	1	-	Wild type	Wild type	psbM	Landrace	Korea, South	2012-12-27
BLG390	IT263320	2	Core collection	Wild type	Wild type	psbM	Landrace	Korea, South	2012-12-27
BLG391	IT263324	1	-	Wild type	Wild type	psbM	Landrace	Korea, South	2012-12-27
BLG392	IT263325	1	Core collection	Wild type	Wild type	psbM	Landrace	Korea, South	2012-12-27
BLG393	IT263327	2	-	d1	d2	Wild type	Landrace	Korea, South	2012-12-27
BLG394	IT263328	2	-	d1	d2	Wild type	Landrace	Korea, South	2012-12-27
BLG395	IT263331	1	-	Wild type	Wild type	psbM	Landrace	Korea, South	2012-12-27
BLG396	IT263332	1	-	Wild type	Wild type	psbM	Landrace	Korea, South	2012-12-27
BLG397	IT263333	2	Core collection	Heterozygous	Heterozygous	psbM	Landrace	Korea, South	2012-12-27
BLG398	IT263334	2	-	d1	d2	Wild type	Landrace	Korea, South	2012-12-27
BLG399	IT263340	3 (dark blue)	-	Wild type	Wild type	psbM	Landrace	Korea, South	2012-12-27
BLG400	IT263341	3 (dark blue)	-	Wild type	Wild type	psbM	Landrace	Korea, South	2012-12-27
BLG401	IT263342	3 (dark blue)	-	Wild type	Wild type	psbM	Landrace	Korea, South	2012-12-27
BLG402	IT263371	3 (light blue)	-	d1	d2	Wild type	Landrace	Korea, South	2012-12-27
BLG403	IT263372	2	-	d1	d2	Wild type	Landrace	Korea, South	2012-12-27
BLG404	IT263373	3 (light blue)	-	d1	d2	Wild type	Landrace	Korea, South	2012-12-27
BLG405	IT263373	2	-	Wild type	Wild type	psbM	Landrace	Korea, South	2012-12-27
BLG406	IT263374	1	-	Wild type	Wild type	psbM	Landrace	Korea, South	2012-12-27
BLG407	IT263375	3 (light blue)	-	d1	d2	Wild type	Landrace	Korea, South	2012-12-27
BLG408	IT263376	2	-	Wild type	Wild type	psbM	Landrace	Korea, South	2012-12-27
BLG409	IT263376	2	-	d1	d2	Wild type	Landrace	Korea, South	2012-12-27
BLG410	IT263377	3 (dark blue)	-	Wild type	Wild type	psbM	Landrace	Korea, South	2012-12-27
BLG411	IT263378	1	-	Wild type	Wild type	psbM	Landrace	Korea, South	2012-12-27
BLG412	IT263379	2	Core collection	Wild type	Wild type	psbM	Landrace	Korea, South	2012-12-27
BLG413	IT263504	1	-	Wild type	Wild type	psbM	Landrace	Korea, South	2012-12-27
BLG414	IT263511	1	-	Wild type	Wild type	psbM	Landrace	Korea, South	2012-12-27
BLG415	IT263515	2	-	Wild type	Wild type	psbM	Landrace	Korea, South	2012-12-27
BLG416	IT263517	2	-	Wild type	Wild type	psbM	Landrace	Korea, South	2012-12-27
BLG417	IT263518	1	-	Wild type	Wild type	psbM	Landrace	Korea, South	2012-12-27
BLG418	IT263519	1	-	Wild type	Wild type	psbM	Landrace	Korea, South	2012-12-27
BLG419	IT263524	2	-	Wild type	Wild type	psbM	Landrace	Korea, South	2012-12-27
BLG420	IT263527	1	-	Wild type	Wild type	psbM	Landrace	Korea, South	2012-12-27
BLG422	IT263733	1	-	Wild type	Wild type	psbM	Landrace	Korea, South	2012-12-27
BLG424	IT263745	2	-	Wild type	Wild type	psbM	Landrace	Korea, South	2012-12-27
BLG425	IT263746	3 (dark blue)	-	Wild type	Wild type	psbM	Landrace	Korea, South	2012-12-27
BLG426	IT263747	3 (dark blue)	-	Wild type	Wild type	psbM	Landrace	Korea, South	2012-12-27
BLG427	IT263747	3 (dark blue)	-	Wild type	Wild type	psbM	Landrace	Korea, South	2012-12-27
BLG428	IT263749	2	-	Wild type	Wild type	psbM	Landrace	Korea, South	2012-12-27
BLG430	IT263750	3 (dark blue)	-	Wild type	Wild type	psbM	Landrace	Korea, South	2012-12-27
BLG431	IT263751	3 (dark blue)	-	Wild type	Wild type	psbM	Landrace	Korea, South	2012-12-27
BLG432	IT263752	3 (dark blue)	-	Wild type	Wild type	psbM	Landrace	Korea, South	2012-12-27
BLG433	IT263753	2	Core collection	Wild type	Wild type	psbM	Landrace	Korea, South	2012-12-27
BLG434	IT263753	2	-	Wild type	Wild type	psbM	Landrace	Korea, South	2012-12-27
BLG435	IT263754	3 (dark blue)	-	Wild type	Wild type	psbM	Landrace	Korea, South	2012-12-27
BLG436	IT263755	3 (dark blue)	-	Wild type	Wild type	psbM	Landrace	Korea, South	2012-12-27
BLG437	IT263760	3 (dark blue)	-	Wild type	Wild type	psbM	Landrace	Korea, South	2012-12-27
BLG438	IT263761	2	-	Wild type	Wild type	psbM	Landrace	Korea, South	2012-12-27
BLG439	IT263762	3 (dark blue)	-	Wild type	Wild type	psbM	Landrace	Korea, South	2012-12-27
BLG440	IT263763	3 (dark blue)	-	Wild type	Wild type	psbM	Landrace	Korea, South	2012-12-27
BLG441	IT263767	2	Core collection	Wild type	Wild type	psbM	Landrace	Korea, South	2012-12-27
BLG442	IT263794	1	-	Wild type	Wild type	psbM	Landrace	Korea, South	2012-12-27
BLG443	IT263794	2	-	Wild type	Wild type	psbM	Landrace	Korea, South	2012-12-27
BLG444	IT263809	2	Core collection	Wild type	Wild type	psbM	Landrace	Korea, South	2012-12-27
BLG445	IT263811	1	-	Wild type	Wild type	psbM	Landrace	Korea, South	2012-12-27
BLG446	IT263811	1	-	Wild type	Wild type	psbM	Landrace	Korea, South	2012-12-27
BLG447	IT263814	3 (dark blue)	-	Wild type	Wild type	psbM	Landrace	Korea, South	2012-12-27
BLG448	IT263815	3 (dark blue)	-	Wild type	Wild type	psbM	Landrace	Korea, South	2012-12-27
BLG449	IT263815	3 (dark blue)	-	Wild type	Wild type	psbM	Landrace	Korea, South	2012-12-27
BLG450	IT263816	2	-	Wild type	Wild type	psbM	Landrace	Korea, South	2012-12-27
BLG451	IT263817	1	-	Wild type	Wild type	psbM	Landrace	Korea, South	2012-12-27
BLG452	IT263819	2	-	Wild type	Wild type	psbM	Landrace	Korea, South	2012-12-27
BLG453	IT263820	2	Core collection	Wild type	Wild type	psbM	Landrace	Korea, South	2012-12-27
BLG454	IT263821	2	-	Wild type	Wild type	psbM	Landrace	Korea, South	2012-12-27
BLG455	IT263822	1	-	Wild type	Wild type	psbM	Landrace	Korea, South	2012-12-27
BLG456	IT263825	1	-	Wild type	Wild type	psbM	Landrace	Korea, South	2012-12-27
BLG457	IT263825	1	-	Wild type	Wild type	psbM	Landrace	Korea, South	2012-12-27
BLG458	IT263826	1	-	Wild type	Wild type	psbM	Landrace	Korea, South	2012-12-27
BLG459	IT263828	3 (dark blue)	-	Wild type	Wild type	psbM	Landrace	Korea, South	2012-12-27
BLG460	IT263832	1	-	Wild type	Wild type	psbM	Landrace	Korea, South	2012-12-27
BLG461	IT263835	3 (dark blue)	-	Wild type	Wild type	psbM	Landrace	Korea, South	2012-12-27
BLG462	IT263836	3 (dark blue)	-	Wild type	Wild type	psbM	Landrace	Korea, South	2012-12-27
BLG463	IT263837	3 (dark blue)	-	Wild type	Wild type	psbM	Landrace	Korea, South	2012-12-27
BLG464	IT263838	3 (dark blue)	-	Wild type	Wild type	psbM	Landrace	Korea, South	2012-12-27
BLG465	IT263839	3 (dark blue)	Core collection	Wild type	Wild type	psbM	Landrace	Korea, South	2012-12-27
BLG466	IT263842	2	Core collection	Wild type	Wild type	psbM	PI209332	Japan	2012-12-27
BLG467	IT263849	2	-	Heterozygous	Heterozygous	Wild type	Landrace	Korea, South	2012-12-27
BLG468	IT263849	1	-	Wild type	Wild type	psbM	Landrace	Korea, South	2012-12-27
BLG469	IT263863	3 (dark blue)	-	Wild type	Wild type	psbM	Landrace	Korea, South	2012-12-27
BLG470	IT263864	3 (dark blue)	-	Wild type	Wild type	psbM	Landrace	Korea, South	2012-12-27
BLG471	IT263868	2	Core collection	Wild type	Wild type	psbM	Landrace	Korea, South	2012-12-27
BLG472	IT263875	3 (dark blue)	-	Wild type	Wild type	psbM	Landrace	Korea, South	2012-12-27
BLG473	RCS618	2	-	Wild type	Wild type	psbM	.	Korea, South	.
BLG474	RCS619	3 (dark blue)	-	Wild type	Wild type	psbM	.	Korea, South	.
BLG475	RCS620	3 (dark blue)	-	Wild type	Wild type	psbM	.	Korea, South	.
BLG476	RCS628	2	Core collection	Wild type	Wild type	psbM	.	Korea, South	.
BLG477	RCS633	2	-	d1	d2	Wild type	.	Korea, South	.
BLG478	RCS636	2	-	Wild type	Wild type	psbM	.	Korea, South	.
BLG479	RCS637	2	-	Wild type	Wild type	psbM	.	Korea, South	.
BLG480	RCS639	3 (dark blue)	-	Wild type	Wild type	psbM	.	Korea, South	.
BLG481	RCS640	2	-	d1	d2	Wild type	.	Korea, South	.
BLG482	RCS1102	3 (dark blue)	-	Wild type	Wild type	psbM	.	Korea, South	.
BLG483	RCS1105	2	Core collection	d1	d2	Wild type	.	Korea, South	.
BLG484	RCS1201	2	Core collection	d1	d2	Wild type	.	Korea, South	.
BLG485	RCS0902S	2	Core collection	d1	d2	Wild type	.	Korea, South	.
BLG486	RCS0902F	1	-	Wild type	Wild type	psbM	.	Korea, South	.
BLG487	RCS0906	2	Core collection	Wild type	Wild type	psbM	.	Korea, South	.
BLG488	IT213320	2	Core collection	Wild type	Wild type	psbM	Landrace	Korea, South	2002-11-27
BLG489	IT215992	2	-	Wild type	Wild type	psbM	Landrace	Korea, South	2004-06-30
BLG490	IT216312	1	-	Wild type	Wild type	psbM	Landrace	Korea, South	2004-06-30
BLG491	IT224515	3 (light blue)	-	d1	d2	Wild type	Landrace	Korea, South	2009-12-16
BLG492	IT224517	3 (light blue)	-	d1	d2	Wild type	Landrace	Korea, South	2009-12-16
BLG493	Cheonja 3	2	-	Wild type	Wild type	psbM	Check	Korea, South	.
BLG494	Uram	2	-	Wild type	Wild type	Wild type	Check	Korea, South	.
BLG495	Cheonja	2	-	Wild type	Wild type	psbM	Check	Korea, South	.
D1, D2 are homologs of the STAY-GREEN (SGR) genes, which is similar to the Williams 82 reference genome for Glyma.01g214600 (D1) and Glyma.11g027400 (D2)
PsbM encodes one of the small subunits of photosystem II in the chloroplast genome
Missing data are indicated by a dot

## Sheet: Table S2
Table S2. List of pure line selection from 47 accessions
#	Name	IT number	Subpopulation	D1 genotype	D2 genotype	PsbM genotype	Breeding line or landrace	Origin of nation	Collection date
1	BLG31	IT186094	3 (light blue)	d1	d2	Wild type	Landrace	Korea, South	1994-01-01
	BLG32	IT186094	3 (light blue)	d1	d2	Wild type
2	BLG36	IT213192	2	Wild type	Wild type	psbM	Breeding line	Korea, South	2002-04-30
	BLG37	IT213192	2	Wild type	Wild type	psbM
3	BLG50	IT189640	3 (light blue)	d1	d2	Wild type	Landrace	Korea, South	1995-01-01
	BLG51	IT189640	3 (light blue)	d1	d2	Wild type
4	BLG81	IT177712	1	Wild type	Wild type	psbM	Landrace	Korea, South	1992-01-01
	BLG82	IT177712	2	d1	d2	Wild type
5	BLG83	IT177829	1	Wild type	Wild type	psbM	Landrace	Korea, South	1992-01-01
	BLG84	IT177829	1	Wild type	Wild type	psbM
6	BLG85	IT177832	1	Wild type	Wild type	psbM	Landrace	Korea, South	1992-01-01
	BLG86	IT177832	1	Wild type	Wild type	psbM
7	BLG101	IT195330	1	Wild type	Wild type	psbM	Landrace	Korea, South	1996-01-01
	BLG102	IT195330	1	Wild type	Wild type	psbM
8	BLG157	IT224177	1	Wild type	Wild type	psbM	Landrace	Korea, South	2009-12-16
	BLG158	IT224177	1	Wild type	Wild type	psbM
9	BLG163	IT228789	2	Wild type	Wild type	psbM	Landrace	Korea, South	2010-07-02
	BLG164	IT228789	2	Wild type	Wild type	psbM
10	BLG171	IT177888	1	Wild type	Wild type	psbM	Landrace	Korea, South	1992-01-01
	BLG172	IT177888	1	Wild type	Wild type	psbM
11	BLG177	IT177978	1	Wild type	Wild type	psbM	Landrace	Korea, South	1992-01-01
	BLG178	IT177978	1	Wild type	Wild type	psbM
12	BLG214	IT181945	1	Wild type	Wild type	psbM	Landrace	Korea, South	1993-01-01
	BLG215	IT181945	1	Wild type	Wild type	psbM
13	BLG216	IT186149	2	Wild type	Wild type	psbM	Landrace	Korea, South	1994-01-01
	BLG217	IT186149	2	Wild type	Wild type	psbM
14	BLG223	IT194567	1	Wild type	Wild type	psbM	Landrace	Korea, South	1995-01-01
	BLG224	IT194567	1	Wild type	Wild type	psbM
15	BLG226	IT196826	1	Wild type	Wild type	psbM	Landrace	Korea, South	1996-01-01
	BLG227	IT196826	1	Wild type	Wild type	psbM
16	BLG228	IT208522	1	Wild type	Wild type	psbM	Landrace	Korea, South	1999-01-01
	BLG229	IT208522	1	Wild type	Wild type	psbM
17	BLG233	IT228785	2	Wild type	Wild type	psbM	Landrace	Korea, South	2010-07-02
	BLG234	IT228785	2	Wild type	Wild type	psbM
18	BLG242	IT153440	1	Wild type	Wild type	psbM	Landrace	Korea, South	1988-01-01
	BLG243	IT153440	1	Wild type	Wild type	psbM
19	BLG260	IT177475	3 (light blue)	d1	d2	Wild type	Landrace	Korea, South	1992-01-01
	BLG261	IT177475	1	Wild type	Wild type	psbM
20	BLG271	IT177567	1	Wild type	Wild type	psbM	Landrace	Korea, South	1992-01-01
	BLG273	IT177567	1	Wild type	Wild type	psbM
21	BLG275	IT177609	1	Wild type	Wild type	psbM	Landrace	Korea, South	1992-01-01
	BLG276	IT177609	1	Wild type	Wild type	psbM
22	BLG283	IT177716	1	Wild type	Wild type	psbM	Landrace	Korea, South	1992-01-01
	BLG284	IT177716	1	Wild type	Wild type	psbM
23	BLG290	IT177835	1	Wild type	Wild type	psbM	Landrace	Korea, South	1992-01-01
	BLG291	IT177835	1	Wild type	Wild type	psbM
24	BLG299	IT177890	3 (light blue)	d1	d2	Wild type	Landrace	Korea, South	1992-01-01
	BLG300	IT177890	1	Wild type	Wild type	psbM
25	BLG325	IT178108	1	Wild type	Wild type	psbM	Landrace	Korea, South	1992-01-01
	BLG326	IT178108	1	Wild type	Wild type	psbM
26	BLG330	IT208787	2	Wild type	Wild type	psbM	Landrace	Korea, South	1999-01-01
	BLG331	IT208787	1	Wild type	Wild type	psbM
27	BLG345	IT262882	2	Wild type	Wild type	psbM	Landrace	Korea, South	2012-12-27
	BLG346	IT262882	2	Wild type	Wild type	psbM
28	BLG363	IT263130	1	Wild type	Wild type	psbM	Landrace	Korea, South	2012-12-27
	BLG364	IT263130	1	Wild type	Wild type	psbM
29	BLG368	IT263149	1	Wild type	Wild type	psbM	Landrace	Korea, South	2012-12-27
	BLG369	IT263149	1	Wild type	Wild type	psbM
30	BLG370	IT263227	2	Wild type	Wild type	psbM	Landrace	Korea, South	2012-12-27
	BLG371	IT263227	2	Wild type	Wild type	psbM
31	BLG377	IT263271	1	Wild type	Wild type	psbM	Landrace	Korea, South	2012-12-27
	BLG378	IT263271	1	Wild type	Wild type	psbM
32	BLG380	IT263283	3 (light blue)	d1	d2	Wild type
	BLG381	IT263283	3 (light blue)	d1	d2	Wild type
33	BLG382	IT263284	2	Wild type	Wild type	psbM	Landrace	Korea, South	2012-12-27
	BLG383	IT263284	1	Wild type	Wild type	psbM
34	BLG385	IT263294	2	Wild type	Wild type	psbM	Landrace	Korea, South	2012-12-27
	BLG386	IT263294	2	Wild type	Wild type	psbM
35	BLG388	IT263319	1	Wild type	Wild type	psbM	Landrace	Korea, South	2012-12-27
	BLG389	IT263319	1	Wild type	Wild type	psbM
36	BLG404	IT263373	3 (light blue)	d1	d2	Wild type	Landrace	Korea, South	2012-12-27
	BLG405	IT263373	2	Wild type	Wild type	psbM
37	BLG408	IT263376	2	Wild type	Wild type	psbM	Landrace	Korea, South	2012-12-27
	BLG409	IT263376	2	d1	d2	Wild type
38	BLG426	IT263747	3 (dark blue)	Wild type	Wild type	psbM	Landrace	Korea, South	2012-12-27
	BLG427	IT263747	3 (dark blue)	Wild type	Wild type	psbM
39	BLG433	IT263753	2	Wild type	Wild type	psbM	Landrace	Korea, South	2012-12-27
	BLG434	IT263753	2	Wild type	Wild type	psbM
40	BLG442	IT263794	1	Wild type	Wild type	psbM	Landrace	Korea, South	2012-12-27
	BLG443	IT263794	2	Wild type	Wild type	psbM
41	BLG445	IT263811	1	Wild type	Wild type	psbM	Landrace	Korea, South	2012-12-27
	BLG446	IT263811	1	Wild type	Wild type	psbM
42	BLG448	IT263815	3 (dark blue)	Wild type	Wild type	psbM	Landrace	Korea, South	2012-12-27
	BLG449	IT263815	3 (dark blue)	Wild type	Wild type	psbM
43	BLG456	IT263825	1	Wild type	Wild type	psbM	Landrace	Korea, South	2012-12-27
	BLG457	IT263825	1	Wild type	Wild type	psbM
44	BLG467	IT263849	2	Heterozygous	Heterozygous	Wild type	Landrace	Korea, South	2012-12-27
	BLG468	IT263849	1	Wild type	Wild type	psbM
45	BLG40	IT224517	3 (light blue)	d1	d2	Wild type	Landrace	Korea, South	2009-12-16
	BLG492	IT224517	3 (light blue)	d1	d2	Wild type
46	BLG230	IT213320	1	Wild type	Wild type	psbM	Landrace	Korea, South	2002-11-27
	BLG488	IT213320	2	Wild type	Wild type	psbM
47	BLG335	IT215992	1	Wild type	Wild type	psbM	Landrace	Korea, South	2004-06-30
	BLG489	IT215992	2	Wild type	Wild type	psbM

## Sheet: Table S3
Table S3. Mean squares from analysis of variances of each measured chlorophyll for soybean accessions over 3 years
Source	df	Chlorophyll a	Chlorophyll b	Total chlorophyll
Genotype (G)	466	1081.9***	139.5***	1404.7***
Environment (E)	2	11099.6***	4363.3***	38951.8***
Replication (E)	2	4183.7***	1550.1***	10546.1***
G x E	898	79.2***	26.2*	238.7***
Error	1187	47.2	23.5	173.8
* Significant at the 0.05 probability level. *** Significant at the 0.001 probability level.
Sum of measured chlorophyll a and chlorophyll b.
df; degree of freedom

## Sheet: Table S4
Table S4. Mean squares from analysis of variances of each measured anthocyanin for soybean accessions over 3 years
Source	df	Delphinidin 3-O-glucoside	Cyanidin 3-O-glucoside	Petunidin 3-O-glucoside	Pelargonidin 3-O-glucoside	Peonidin 3-O-glucoside	Malvidin 3-O-glucoside	Total anthocyanins
Genotype (G)	467	3.77***	77.10***	0.46***	0.096***	0.0038***	0.0092***	117.44***
Environment (E)	2	1.31***	211.82***	4.33***	1.627***	0.0164***	0.0426***	161.10***
Replication (E)	2	2.54***	32.85***	0.50***	0.327***	0.0735***	0.0226***	29.32***
G x E	901	0.38***	4.32***	0.04***	0.019***	0.0007***	0.0013***	6.56***
Error	1280	0.16***	2.56***	0.01***	0.006***	0.0003***	0.0003***	3.68***
*** Significant at the 0.001 probability level.
Sum of measured delphinidin 3-O-glucoside, cyanidin 3-O-glucoside, petunidin 3-O-glucoside, pelargonidin 3-O-glucoside, peonidin 3-O-glucoside and malvidin 3-O-glucosie.
df; degree of freedom
